# Supplementary material for: Control of M. tuberculosis ESAT-6 Secretion and Specific T Cell Recognition by PhoP
Source: PLOS journal article supplement (doi:10.1371/journal.ppat.0040033), 2008-02-11
Supplement: S2 (10.1371/journal.ppat.0040033.s002) [file journal.ppat.0040033.s002]

**Table S2. Primers and Probes Used for Quantitative RT-PCR**

| Target Gene | Primers | Probes |
| --- | --- | --- |
| *rv3614c* | GCACGGTGTCGGTATCGA | 6FAM-ACGGCCGGATTGACCA |
|  | TGGCCGACAGCTCGAC |  |
| *rv3865* | CGAGTTCAGCTTACCCATGGTT | 6FAM-TTCACGTCGAAATTC |
|  | CAAACTCTTGCAGCGTGTCATT |  |
| *rv3867* | GCTGGCCGACGAGATCTT | 6FAM-CAGATCGGCAATAACG |
|  | GCCCGCGCCTTTTGG |  |
| *phoP* | ACTATGTGACAAAGCCCTTCAGTTT | 6FAM-CTGGCCACGACCTCC |
|  | CGCGTCGCAGGATGAC |  |
| 16S-RNA gene | GTGGACTACCAGGGTATCTAATCCT | 6FAM-TCCCCACGCTTTCG |
|  | GGGTCTCTGGGCAGTAACTG |  |

Primers and probes were designed by custom TaqMan MGB gene expression assays service (Applied Biosystems, Foster City, USA).
